# Supplementary material for: New Monoclonal Antibodies Specific for Different Epitopes of the Spike Protein of SARS-CoV-2 and Its Major Variants: Additional Tools for a More Specific COVID-19 Diagnosis
Source: Biomedicines. 2023 Feb 18;11(2):610. doi: 10.3390/biomedicines11020610 (PMC9953266; doi:10.3390/biomedicines11020610)
Supplement: Supplementary file 1 [file biomedicines-11-00610-s001.zip › Supplementary Fig. S2.pdf]

**Figure S2.** Clustal Omega multiple sequence alignment. Aminoacidic sequence of SARS-CoV-2 spike protein (NCBI accession number YP\_009724390) was compared to that of alpha-HCoV 229E (NCBI accession number NP\_073551.1) and NL63 (NCBI accession number BBL54116.1), beta-HCoV OC43 (NCBI accession number AOL02453.1) and HKU1 (NCBI accession number AXT92561.1), MERS (NCBI accession number YP\_009047204.1) and SARS-CoV (NCBI accession number AAP33697.1). Residues marked in bold correspond to epitopes recognized by mAbs described in the work. Conserved residues between Sars-Cov-2 and one or more of the others are marked in red.

```

229E      -----0
NL63      --mklfllllilplvscfstcnsn-----asismqlqlgvpdnsstivtgllp 45
OC43      ---mflillislpta--favigdl---ncpldprlkgsfnnrdtgppsistdtv---- 46
HKU1      ----mfliifilptt--lavigdf---nctns----finhynktiiprisedvv---- 40
MERS      mihsvflmlflltptesyvdpdsvksacievdi---qqtffdktwprp----i---- 48
SARS-CoV-2      ----mfvflvllplv-s-----sqcvn--l---tt--rtqlppay----- 28
SARS-CoV      ----mfifllfltlts-s-----gsdld--r---cttfddvqapny---tq----- 32

```

aa 21-40  
- mAb S200

```

229E      -----0
NL63      vhwicanqststypangffyyidvgkharsafalhsgyyda----nqyyiyltnkislnap 100
OC43      -----dvtnglgttyyvlrdvylnttflngyyptsgstyrnm-----alkgtdl 90
HKU1      -----dvslglgttyyvlrvlylnttllftgyfpgsganfrdl-----alkgsty 84
MERS      -----dvskadgiitypqqgrtysnitityqglf-pyqgdhgdmyvysaghatgttp 97
SARS-CoV-2      -----tnsftgrgvypdkvfrssvlhstqdlflpfpsnvt---wfhaihvsngtn 75
SARS-CoV      -----htssmrgvyyppdeifrsdtlyltqdlflpfysnvt---gfhtin----- 73

```

```

229E      -----mf 2
NL63      vtlkickfgnt-sfdflsnvstshhcivnssfteqlgvplgitisgetvrlhlynatrtf 159
OC43      lst--lwfkppflsdfingifakvk---n---tkvfkdgv-----mysefpai 130
HKU1      lst--lwykppflsdfnngifskvk---n---tklyvnn-----lysefsti 124
MERS      qklfvanysqd-vkqfangfvvrig---a-----aanstgtviispstsatirkiypaf 147
SARS-CoV-2      tkr---fdnp-vlpfndgvfast---e-----ksniirgw 104
SARS-CoV      -ht---fgnp-vipfkdgifyfaat---e-----ksnvvrwg 101

```

```

229E      vllvaya-----l-lhiagcqttnlntsysvcngcvgyseenvf 40
NL63      yvpaaykltkl-svkcyfsefcvsvvna-tvtvnvtlngrivnytvcdcdngytdnif 217
OC43      tigstfvntsy-----svvvqprtinstqdgvnklqg-llevsvcq----- 170
HKU1      vigsvfvntsy-----tinvqph-----ng-ileitacq----- 152
MERS      mlgssvgnfsgdkmgrffnhtlvllpd-----g-----c-gtllraf----- 183
SARS-CoV-2      ifgttldsktq-----sllivnn-----a-----t-nvvikvce----- 132
SARS-CoV      vfgstmnnksq-----sviinn-----s-----t-nvviracn----- 129

```

```

229E      avesggyipsdfafnnwflntntssvvdgvvrsfqpllnclwsvsgrlfttgfvyf--- 97
NL63      svqqdgripngfsfnwflntngstlvdgvsrlyqplrltclwpvpglksstgfvyf--- 274
OC43      -----ynmcehphtichpnlgnhfk--- 190
HKU1      -----ytmccephtvcrsk-gsirn--- 171
MERS      -----ycileprsgnhcpagnsytsfa 205
SARS-CoV-2      -----fqfcndpflgvyyhknn----- 149
SARS-CoV      -----felcdnpffavskpmgt----- 146

```

```

229E      --ngtgr-gdckgfssd-vlsd---virynlnfee-----nlrrg-----tilf 134
NL63      --natgsdvncngyqhh-svad---vmrynlfnssnsv---dnlksq-----vivf 316
OC43      -----elwhldtgvv-sclykrnftdyvnatyl-----yfhf 221
HKU1      -----eswhidssep-lclfkknftynvsadwl-----yfhf 202
MERS      tyhtpatdcsgnynrnaslnsfkeyfnlrnctfmytynitedeilewfgitqtaqg-vh 264
SARS-CoV-2      -----kswmesefrvyssannctfeyvsqpflmdlegkqgnfknrlrefvf 194
SARS-CoV      -----qthtmifdnafnctfeyisdafslvdseksngnfkhlrefvf 187

```

229E ktsygvvvfyctnntlv-s-----gdahipfgtvlgnfyfcvnttignettsaf 182  
 NL63 ktlqydvlfycsnsssg-v-----ldttipfgpssqpyycfinstintthvstf 364  
 OC43 yqeggtfyayftd-----tgfvtk-flfnvylgmalshyyvmlt----- 260  
 HKU1 yqergvyfayyad-----vgmptt-flfslylgtlshyyvmlt----- 241  
 MERS lfssryvdlygg-----mfqfatlpvydtikyysiiphs----- 299  
**SARS-CoV-2** knidgyfkiyskhtpinlvrdlpqggsaleplvdlpiginitrfqtllal----- 244  
 SARS-CoV knkdglyvykyqpdivvrdlpsgfntlkpifklplginitnfrailta----- 237

229E vgalpktivrefv-isrtghfyngyryftlgnveavnfnvttatettdfctvalasyadvl 241  
 NL63 vgvlp pivreiv-vartgqfyngfkyfdlglfieavnfnvttasatdfwtvafatfvdvl 423  
 OC43 -----ci---s---rrd-----igftleywvtptrqyll 285  
 HKU1 -----cn---aispkt-----dnetleywvtpsrqyll 268  
 MERS -----ir---siqsdrcaw-----aafyvvyklqpltfll 325  
**SARS-CoV-2** -----hrsyltpgdsssgw-----tagaaayyvgylqprtfl 277  
 SARS-CoV -----fs-----paqdiw-----gtsaaayfvgylkpttfml 264

229E vnvsqtsianiiycn-svinrlrcdqlsfdvpdgfystspiqsvelpvsivslpvyh--- 297  
 NL63 vnvsatniqnlllycd-spfeklqcehlqfqlqdgfy sanflddnvlpdyvalpiyy--- 479  
 OC43 afnqdgii fnavdcmsdfmsei kcktgsiapptgvyelngytvqpiadvyrkpdlnpcn 345  
 HKU1 nfd ehgvitnavdcsssf lsei qcktg sfapntgvydlsgftvkpvatvyrripnlpdcd 328  
 MERS dfsvdgyirraidcgfndlsqhlcsyesfdvesgvyssvssfeakpsgsvveqaeg-vecd 384  
**SARS-CoV-2** kynengtiddavdcaldplsetkctlsftvekgiyqtsnfrvqptesivrpfnitnlcp 337  
 SARS-CoV kyden gtiddavdcsqnplaelkcsvksfeidkgiyqtsnfrvvpsgdvvrpfnitnlcp 324

aa 281-300  
 - mAb S37

aa 301-320  
 - mAb S75  
 - mAb S106

229E -----khtfivlyv-----dfkpqsgggkcfcncypa 323  
 NL63 -----qhtdinf-----atasfggscycvckph 502  
 OC43 ieawlndksvp splnwerktfsncnfmsslmsfiqadsftcnnidaakiygmcfssi-- 403  
 HKU1 idnwlnnsvsp splnwerrifsn cnfnl stllrlvhvdsfscnnldkskifgscfnsi-- 386  
 MERS fsp lls g-tppqvynfkr lrvftncnynl tkllslfsvndftcsqispaaiasncyssl-- 441  
**SARS-CoV-2** fgevfnatrfasvyawnrkrisncvadysvlyn sasfstfkcycgvsptklndlcftnv-- 395  
 SARS-CoV fgevfnatkfp svyawerkkisncvadysvlynstffstfkcycgvsatk lndlcfsnv-- 382

229E gvnitlanfne---tkgplcvdtshfttkyvavya-----nvgrwsasin---t----- 366  
 NL63 qvnislng-----ntsvcvrtshfsiriyinrvksgspgdsswhiylk---s----- 546  
 OC43 ----tidkfaipnrrkvdlqlgnlgylqssnyridttatsscqllynlpaanvsvsr-fnp 458  
 HKU1 ----tvdkfaipnrrrdldlgssgflqssnykidisssscqllyslpllnvtinn-fnp 441  
 MERS ----ildyfsyplsmksdlsvssagpisqfnykqsfnsptclilatvphnl ttitkplky 497  
**SARS-CoV-2** ----yadsfvirgdevrqiapggqtgiadynyklpddftgcviawnsnldskvggnyny 451  
 SARS-CoV ----yadsfvvkgddvrqiapggqtgiadynyklpddfmgcvlawntrnidatstgnyny 438

229E --gncpfsfgkvnnfvkf-----gsvcfslkdipggca-----mpiv 401  
 NL63 --gtcpfsf sklnnfqkf-----kticfstvavpgscn-----fple 581  
 OC43 stwnkrfgfiedsvfvpqptgvftnhsvvyaqhcfkapknfcpcss-----cpgknngi 512  
 HKU1 sswnrrygfgsfv-----ssydvvydhcfsvnsdfcpcadpsvvnscvkskpls 492  
 MERS syinkcsr-----llsddrtev-----pqlvn--anqyspcvs-----ivpst 533  
**SARS-CoV-2** lyrlfrks-----nlkpferdi-----steiy--qagstpcng-----vegfn 487  
 SARS-CoV kyrylrhg-----klrpferdi-----snvpf--spdgkpctp-----paln 473

229E anwayskyyti----- 412  
 NL63 atwhysytiv----- 592  
 OC43 gtcpgagntyltcdn-----lctldpitfkadykcpqtkslvgigehcsgl 559  
 HKU1 aicpagtkyrhcdldtttlyvknwcrscldpdisty--spntcpqkkvvvgigehcpgl 550  
 MERS -vwedgdyyrk-----qlsplegg-----gw----- 553  
**SARS-CoV-2** cyf-----plqsy-----gf----- 497  
 SARS-CoV cyw-----plndy-----gf----- 483

229E -----gslyvswsdgdgitgv-----pppveg----- 434

NL63 -----galyvtwsegsitgv-----pypvsg----- 614  
 OC43 avksdycg-----nscctcpqafglwsadscldgdkcnifanfilhdvnnlgtcstd--l 613  
 HKU1 gineekcgtqlnhtscscspdaflgwsfdscisnncnifsnfifnginsgttcsnd--l 608  
 MERS -----lvasgstvamteqlmqmfgit-----vqygtatnsvcpklefa 591  
**SARS-CoV-2** -----qptngvgypyrvvlsfell-----hapatvcgp----- 527  
 SARS-CoV -----ytttgigyqpyrvvlsfell-----napatvcgp----- 513

229E vssfmnvtldkctkyniydvsgvgvirvsndtflng---itytstsgnl-lgfkdvtkgt 490  
 NL63 irefslnlvlnnctkyniydyvgtgiirsnnqslagg---ityvsnsgnl-lgfkvnstgn 670  
 OC43 qkanteielgvcvnydlygisgqgifvevnatyynswqnllydsn-gnly-gfrdyitnr 671  
 HKU1 lysntevstgvcvnydlygitgqgifkevsaayynnwqnllydsn-gnii-gfkdfitnk 666  
 MERS ndtkiasqlgncveyslygvsvgrgvfqnctavg-vrqrqvday-qnlvgysd--dgn 647  
**SARS-CoV-2** -kkstnlvknkcvnfnglgtgtgvltesnkkf-lpfqqfgrdia-dtt-davrdpqt 583  
 SARS-CoV -klstdliknqcvnfnglgtgtgvltpsskrf-qpfqqfgrdvs-dft-dsvrdp 569

aa 550-580  
 - mAb S71  
 - mAb S79  
 - mAb S178

229E iysitpcnppdqlvvyqqa-----vvgamlsenftsygfsn-----vvelpkf 533  
 NL63 ifivtpcnppdqavvyqqs-----iigamtavnesryglhn-----llqlpnf 713  
 OC43 tfmihscysgrvsaayh--anssepallfrnikcnyvfnnsltrqlq-----piny 720  
 HKU1 tytilpcysgrvsaafy--qnssspallyrnlkcsyvlennis---fi-----sqpf 712  
 MERS yyclracvsvpvsviyd--ketkthatlfgsvacehisstmsqysrstrsmlkrrdstyg 705  
**SARS-CoV-2** ilditpcsfggvsvitpgtntsnqvavlyqdvntevpvaihadtlt--ptwrystg 641  
 SARS-CoV ilditpcsfggvsvitpgtnassevavlyqdvntdvstaihadqtl--pawriystg 627

229E fyasngtynctdavl-----tyssfvgcadgsiaa-vq---prnvsydsvs--- 575  
 NL63 yyvsnngncttavm-----tysnfgicadgslip-vr---prnssdngis--- 755  
 OC43 sfds--ylgcvvnaynstaisvqtcdltvgsgycvdydk--nrrsrraittgyrftn-fe 775  
 HKU1 yfds--ylgcvlnavnltsysvsscdlrmgsgfcidyalpssrrkrgrgisspyrfvt-fe 769  
 MERS plqt--pvgcvlglvnss-lfvedcklplgqslcalpdpstltpsvrsvpgemrlasi 762  
**SARS-CoV-2** vftq--ragcligaehvn--nsyecdiipigagicasygtqt-nsprar vsvasgsi---i  
 SARS-CoV vfqt--qagcligaehvd--tsyecdiipigagicasyhtvs-l----lrstsqksi---v 675

aa 661-682  
 - mAb S12  
 - mAb S157

229E -----aivtanlsipsnwttsvqveylqitstpiivdcastyvcngnvrvel 622  
 NL63 -----aaitanlsipsnwttsvqveylqitstpiivdcastyvcngnvrcknl 802  
 OC43 pftvnsvndslepvgglyeiqipseftignmeefiqtsspkvtidcaafvcgdyacklq 835  
 HKU1 pfnvsfsvndsletvgglfeiqiptnftiagheefiqtsspkvtidcsafvcsnyaaachd 829  
 MERS afnhpiq-v-dqlnssyfklsiptnfsfgvtqeyiqttiqkvtvdckqyvcngfqqceql 820  
**SARS-CoV-2** aytmslg-aensvaysnnsiaiptnftisvtteilpvsmtktsvdctmyicgdstecsnl 752  
 SARS-CoV aytmslg-adssiaysnntiaiptnfsisittevmpvsmaktsvdcmmyicgdstecanl 734

aa 686-700  
 - mAb S136  
 - mAb S222  
 - mAb S223

229E lkqytsacktiedalrnsarlesadvsemltfdkkaftlan-----vssfkd-ynlssvi 676  
 NL63 lkqytsacktiedalrnsahletndvssmltfdsnafslan-----vtsfgd-ynlssvl 856  
 OC43 lveygsfcdninailtevnelltdtqlqvanslmngvtlstkldgvnfnvddinfspvl 895  
 HKU1 lseygtfcdninsilnevndllditqlqvanalmqgvtlssnlnlnhsvdnidfkssl 889  
 MERS lreygqfcskinqalghanlrqddsvrnlfasvkssqsspi-----ipgfggdfnltlle 875  
**SARS-CoV-2** llqygsfctqlnraltgiaveqdkntqevfaqvkkqiyktp-----ikdfggf-nfsqil 806  
 SARS-CoV llqygsfctqlnralsgiaaeqdrntrevfaqvkkqiyktp-----lkyfggf-nfsqil 788

229E pslptsgsrvagrsaiadilfsklvtslgtvdadykkct--kglsiadlacaqyyngim 734  
 NL63 pqrnihssriagrsaledllfskvvtsglgtvdvdyksct--kglsiadlacaqyyngim 914  
 OC43 gclgsecskassrsaiadllfdkvklsdvqfve-aynnct--ggaeirdlicvqsykgik 952  
 HKU1 gclgsqcgssrsllledllfnkvklsdvqfve-aynnct--ggseirdllcvqsfngik 945  
 MERS p-vsistgssrsarsaiadllfdkvtiadpgymq-gyddcmqggpasardlicaqyvagyk 933  
**SARS-CoV-2** p-dp---skpskrsfiedllfnkvltladagfik-qygdcl--gdiaardlicaqkfnglt 859  
 SARS-CoV p-dp---lkptkrsfiedllfnkvltladagfkm-qygecl--gdinardlicaqkfnglt 841

229E vlpgvadaermamytgsliggialggltsa---vsipfslaiqarlhyvalqtdvqlen 790  
 NL63 vlpgvadaermamytgsliggmvlgltsa---aaipfslalqarlhyvalqtdvqlen 970  
 OC43 vlppllsenqisgytlaatsasflppwtaa---agvpfylvqyringlgvtmdvlsqn 1008  
 HKU1 vlppilsetqisgyttaatvaamfppwsaa---agvpfslnvqyringlgvtmdvlnkn 1001  
 MERS vlpplmdvnmeaaytssllgsiagvgwtaglssfaaipfaqsifyrlngvgitqqvlsen 993  
**SARS-CoV-2** vlpplltdemiaqytsallagtitsgtwtfagaaalqipfamqmayrfngigvtnvlyen 919  
 SARS-CoV vlpplltdemiaaytaalvsgtatagwtfgagaaalqipfamqmayrfngigvtnvlyen 901

|                   |                                                              |      |
|-------------------|--------------------------------------------------------------|------|
| 229E              | qkilaasfnkamtnivdaftgvndaitqtsqalqtvatalnkiqdvvnqggslnhltsq  | 850  |
| NL63              | qkilaasfnkainnivasfssvndaitqtataihtvtialnkiqdvvnqggsalnhltsq | 1030 |
| OC43              | qklianafnnalhaiqqgfdatn-----salvkiqavvnanaealnllqq           | 1054 |
| HKU1              | qklianafnkallsiqngftatn-----salakiqsvvnnaqalnsllqq           | 1047 |
| MERS              | qklianqfnqalgamgtgfttn-----eafqkvqdavnnnaqalnsklase          | 1039 |
| <b>SARS-CoV-2</b> | qklianqfnsaigkiqdslstta-----salgklqdvvnqnaqalntlvkq          | 965  |
| SARS-CoV          | qkqianqfnkaisqigeslttts-----talgklqdvvnqnaqalntlvkq          | 947  |

|                   |                                                                |      |
|-------------------|----------------------------------------------------------------|------|
| 229E              | lrqnfqaiissisqaiydrldtiqadqqvdrilitgrlaalnfvshltlkytevraserqla | 910  |
| NL63              | lrhnfgaisnsisqaiydrldsiqadqqvdrilitgrlaalnafvsqvlntytevrssrrla | 1090 |
| OC43              | lsnrfgaissaslqeilsrldaleaeaqidrlingrltalnayvsqqlsdstlvkfssaqa  | 1114 |
| HKU1              | lfnkfgaisssslqeilsrldnleaqvqidrlingrltalnayvsqqlsditlikagasra  | 1107 |
| MERS              | lsntfgaisasigdiqrldvleqdaqidrlingrlttlnafvaqqvlvrseasaalsaq    | 1099 |
| <b>SARS-CoV-2</b> | lssnfgaissvlnldilsrldkveaevqidrlitgrlqslqtyvtqqliraaeirasana   | 1025 |
| SARS-CoV          | lssnfgaissvlnldilsrldkveaevqidrlitgrlqslqtyvtqqliraaeirasana   | 1007 |

|                   |                                                                |      |
|-------------------|----------------------------------------------------------------|------|
| 229E              | qqkvnevcvksqskrygfcgngthifsiivnaapeglvflhtvllptqykdvawsglcvdg  | 970  |
| NL63              | qqkinevcvksqsnrygfcgngthifsiivnsapdglflhtvllptdyknvkawsgicvdg  | 1150 |
| OC43              | mekvnevcvksqssrinfrcgngnhiislvqnapyglyfihfnyvptkyvtakvspglciag | 1174 |
| HKU1              | iekvnevcvksqsprinfrcgngnhilslvqnapygllfihfsykptsfktvlvspglclsg | 1167 |
| MERS              | kdkvnevcvkaqskrsqgfcgngthifsvvnapnglyfmhvggyppsnhievvsayglcdaa | 1159 |
| <b>SARS-CoV-2</b> | atkmscvlqgskrvdfcgkgyhlmsfpqsaphgvvflhvtvypaqeknfttapaichdg    | 1085 |
| SARS-CoV          | atkmscvlqgskrvdfcgkgyhlmsfpqaaphgvvflhvtvypsqernfttapaichdg    | 1067 |

|                   |                                                                |      |
|-------------------|----------------------------------------------------------------|------|
| 229E              | tn--gyvlrqpnalaly---kegnyyritsrimepriptmadfvqiencnvtfvnisrse   | 1025 |
| NL63              | iy--gyvlrqpnlvly---sdngvfrvtsramfqprlpvlsdfvqiyncnvtfvnisrve   | 1205 |
| OC43              | nr--giapksgyfvvn-----ntwmytgsgyyypepitennvvvmstcavnytkapyvm    | 1227 |
| HKU1              | dr--giapkqgyfikq----ndswmftgssyyypepisdknvvmfmscsvnftkapfiy    | 1220 |
| MERS              | nptnciapvngyfiiktntntrivdewsytgssfyapepitslntkyvapqvytqn-istnl | 1218 |
| <b>SARS-CoV-2</b> | ka---hfpregvfvsn-----gthwfvtrnfyepqiittndntfvsgncdvvigivmntv   | 1137 |
| SARS-CoV          | ka---yfpregvfvsn-----gtswfitqrnfspqiittndntfvsgncdvvigiiinntv  | 1119 |

|                   |                                                             |      |
|-------------------|-------------------------------------------------------------|------|
| 229E              | l--qtivpeyidvnktlqelsyklpnypvdl-vveqynqtilnltseistlenksaeln | 1082 |
| NL63              | l--htvipdydvvnktlqefaqnlpyvkpnf-dltpfnltylnlsselkqleaktaslf | 1262 |
| OC43              | l--ntsipnlpdfkeeldqwfknqtsv-aphlsld-yinvtfldl-----q         | 1269 |
| HKU1              | l--nnsipnlstdfeafslwfknhntsi-apnltnfnshinatfldl-----y       | 1263 |
| MERS              | pppllgntgidfdqdeldeffknvsts-ipnfgsltqinttllldl-----t        | 1263 |
| <b>SARS-CoV-2</b> | ydplq--peldsfkeeldkyfknhtsp-dvdldgdisginasvvn-----q         | 1180 |
| SARS-CoV-1        | ydplq--peldsfkeeldkyfknhtsp-dvdldgdisginasvvn-----q         | 1162 |

|                   |                                                               |      |
|-------------------|---------------------------------------------------------------|------|
| 229E              | ytvqklqtlidninstlvdlkwlrvetyikwpwwvlcisvvlifvvsmlllcccstgc    | 1142 |
| NL63              | kttvelqglidqinstyvdtkllnrnyfikwpwwvliisvfvvllslvfcclstgc      | 1322 |
| OC43              | vemnrlqeaikvlnhsylnkdigtieyyvkwpyvwllclagvamlvllfficcctgc     | 1329 |
| HKU1              | yemnviqesikslnssfinlkeigtyemyvkwpywiwllvilfiiflmilfficcctgc   | 1323 |
| MERS              | yemlsllqqvkalnesyidlkelgnytyynkwpywiwlgfiagglvalalcvffilcctgc | 1323 |
| <b>SARS-CoV-2</b> | keidrlnevaknlneslidlqelgkyeqyikwpwyiwlgfiaggliaivmtimlccmtsc  | 1240 |
| SARS-CoV          | keidrlnevaknlneslidlqelgkyeqyikwpwyiwlgfiaggliaivmtillccmtsc  | 1222 |

|                   |                                         |      |
|-------------------|-----------------------------------------|------|
| 229E              | cgffscfassirgcce--stklpyydv ekihiq----- | 1173 |
| NL63              | cgccncltssmrgccdcgstklpyyefekvhvq-----  | 1355 |
| OC43              | gtscf-----k--kcggccdytgyqelvik-tshdd--  | 1358 |
| HKU1              | gsacf-----s--kchnccdeyghndfvik-ashdd--  | 1352 |
| MERS              | gtncm-----gklcnrccdryeeydlephkvvh----   | 1353 |
| <b>SARS-CoV-2</b> | csclk-----gccscgscckf-deddsepvlgvklhyt  | 1273 |
| SARS-CoV          | csclk-----gacscgscckf-deddsepvlgvklhyt  | 1255 |
